# Supplementary material for: Public awareness of the EMS system in Western Saudi Arabia: identifying the weakest link
Source: Int J Emerg Med. 2015 Sep 7;8:35. doi: 10.1186/s12245-015-0070-7 (PMC4561947; doi:10.1186/s12245-015-0070-7)
Supplement: Additional file 1: — The EMS public awareness questionnaire. [file 12245_2015_70_MOESM1_ESM.pdf]

- ### Questionnaire Part 1: for the General Public:
